# Supplementary material for: Two-dimensional radical–cationic Mott insulator based on an electron donor containing neither a tetrathiafulvalene nor tetrathiapentalene skeleton
Source: Royal Society of Chemistry journal article supplement (doi:10.1039/d0ce00878h), 2020-01-01
Supplement: d0ce00878h1.pdf [file d0ce00878h1.pdf]

Supplementary Information

**Two-dimensional radical-cationic Mott insulator based on an electron donor containing neither tetrathiafulvalene nor tetrathiapentalene skeleton**

*Tomofumi Kadoya, Shiori Sugiura, Keishiro Tahara, Toshiki Higashino, Kazuya Kubo, Takahiko Sasaki, Kazuo Takimiya, and Jun-ichi Yamada*

E-mail: [kadoya.t@sci.u-hyogo.ac.jp](mailto:kadoya.t@sci.u-hyogo.ac.jp), [s.sugiura@imr.tohoku.ac.jp](mailto:s.sugiura@imr.tohoku.ac.jp), [yamada@sci.u-hyogo.ac.jp](mailto:yamada@sci.u-hyogo.ac.jp)

## DFT calculation

To estimate the respective distribution maps of HOMO shown in Chart 1, density functional theory (DFT) calculations were performed with Gaussian09 program<sup>S1</sup> using the Becke, three-parameter, Lee–Yang–Parr (B3LYP) hybrid exchange-correlation functional<sup>S2</sup> and the 6-31G\* basis set<sup>S3</sup> for a full geometry optimization. Molecular orbital composition analysis was conducted using the GaussSum Program.

## Crystallographic data

Table S1 Crystallographic data of  $\theta$ -(BEDT-BDT)PF<sub>6</sub>.

|                                                      |                                                                |
|------------------------------------------------------|----------------------------------------------------------------|
| Chemical formula                                     | C <sub>14</sub> H <sub>10</sub> F <sub>6</sub> PS <sub>6</sub> |
| Formula weight                                       | 515.56                                                         |
| Crystal shape                                        | red-brown plate                                                |
| Crystal size (mm <sup>3</sup> )                      | 0.218×0.182×0.017                                              |
| Crystal system                                       | monoclinic                                                     |
| Space group                                          | C2/c                                                           |
| <i>a</i> (Å)                                         | 36.971(15)                                                     |
| <i>b</i> (Å)                                         | 4.3814(15)                                                     |
| <i>c</i> (Å)                                         | 11.483(5)                                                      |
| $\alpha$ (°)                                         | 90                                                             |
| $\beta$ (°)                                          | 106.352(5)                                                     |
| $\gamma$ (°)                                         | 90                                                             |
| <i>V</i> (Å <sup>3</sup> )                           | 1784.8(12)                                                     |
| <i>Z</i>                                             | 4                                                              |
| Unique reflections ( <i>R</i> <sub>int</sub> )       | 1644 (0.0247)                                                  |
| <i>D</i> <sub>calc</sub> (g/cm <sup>3</sup> )        | 1.919                                                          |
| <i>R</i> <sub>1</sub> ( <i>I</i> >2.00σ( <i>I</i> )) | 0.1069                                                         |
| w <i>R</i> <sub>2</sub> (All reflections)            | 0.3406                                                         |
| GOF                                                  | 1.615                                                          |
| Temperature (K)                                      | 273                                                            |
| CCDC number                                          | 1983743                                                        |

## A Definition of the dihedral angle

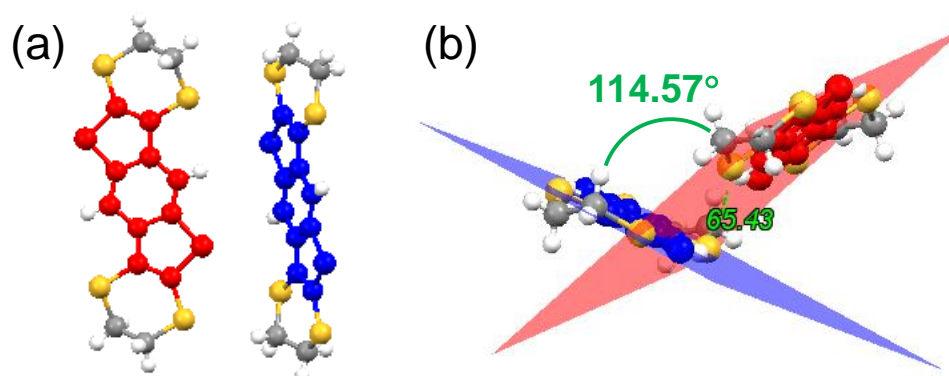

Fig. S1 (a) A plane definition of the benzodithiophene moiety and (b) a dihedral angle between the planes formed by two BEDT-BDT molecules on adjacent stacks.

As shown in Fig. S1a, flat benzodithiophene moieties (red and blue parts) were used to define the molecular plane because the whole molecular structure of BEDT-BDT is not perfectly planar. Fig. S1b shows the resulting dihedral angle, which is  $\sim 114.6^\circ$ .

## Optical image of sample

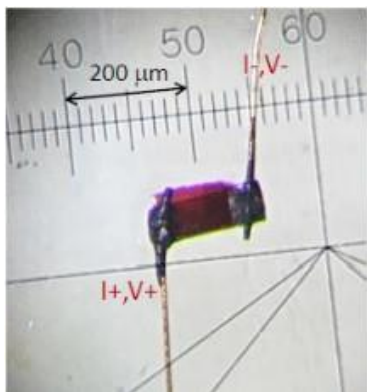

Fig. S2 Optical image of a single crystal of  $\theta$ -(BEDT-BDT)PF<sub>6</sub> which used for the two probe measurement.

## Spin concentration

The Curie constant  $C$  is given by the following equation:

$$C = \frac{NS(S + 1)g^2\mu_B^2}{3k_B},$$

where  $N$  is spin density,  $S$  is a spin quantum number ( $S = 1/2$ ),  $g$  is a g-factor ( $g = 2$ ),  $\mu_B$  is a Bohr magneton, and  $k_B$  is a Boltzmann constant. When  $C = 0.19$  emu K/mol is used,  $N$  is determined to be 0.507.

## Analyses of the magnetic properties

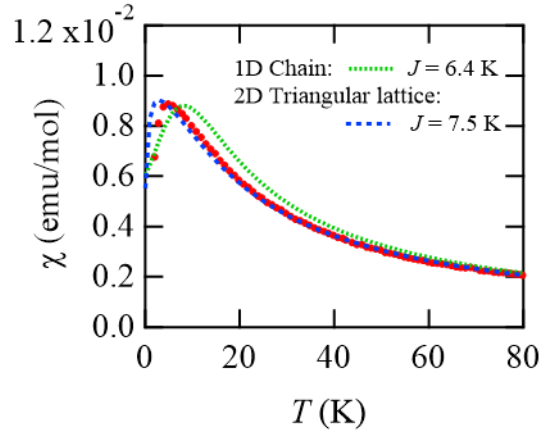

Fig. S3 Enlarged view of magnetic susceptibility below 80 K (Fig. 3a). Dotted and dashed curves are the calculated susceptibility by using Heisenberg model.

Figure S3 shows the temperature dependence of the magnetic susceptibility, which is the enlarged view of Fig. 3a at low temperature. The exchange coupling  $J$  in the spin Hamiltonian (Heisenberg model),

$$\hat{H} = \sum JS_i \cdot S_j,$$

was estimated as  $\sim 7.5$  K by comparison with the calculated results (a blue dashed curve in Fig. S3). The result includes the spin concentration obtained by the Curie constant. Here, we have used the two-dimensional (2D) triangular lattice obtained from the extrapolation method using the [7/7] Padé approximation<sup>15</sup> as follows:

$$\chi = \frac{C k_B 4x(1 + a_1x + \dots + a_6x^6)}{J(1 + b_1x + \dots + b_7x^7)},$$

where,  $x = J/4k_B T$  and  $C = N_A g^2 \mu_B^2 / 4k_B$  ( $N_A$  is an Avogadro constant). The suggested coefficients are as follows:

$$a_1 = 13.1382922, \quad a_2 = 38.2639722, \quad a_3 = 214.74454,$$

$$a_4 = 260.983171, \quad a_5 = 622.734802, \quad a_6 = 186.114208,$$

and

$$b_1 = 19.1382922, \quad b_2 = 129.093725, \quad b_3 = 597.98788,$$

$$b_4 = 1902.06491, \quad b_5 = 3943.84464, \quad b_6 = 5164.9974,$$

$$b_7 = 3452.67229.$$

The calculated result for the one-dimensional (1D) Heisenberg chain<sup>S4</sup> is also shown in Fig. S3 (a green dotted curve). From the comparison of temperature dependence, where the magnetic susceptibility takes the maximum value, the 2D triangular lattice is more suitable than the 1D chain.

In Fig. 3d, the paramagnetic like magnetization curve, which is proportional to external magnetic field, was observed at low field region. Above  $\sim 2$  T, the magnetization was gradually suppressed as the fields strengthened owing to the weak exchange coupling  $J$  between spins. This field dependence can be fitted (a dotted black curve) by using the modified Brillouin function  $B_S(x)$ <sup>S5</sup> as follows;

$$M_{\text{cal}} = \alpha M_0 B_S(x) + \beta M_i,$$

where  $M_0 = g\mu_B S N_A$  and impurity magnetization is  $M_i$ . Here,  $S$  is a spin value ( $S = 1/2$ ),  $g$  is the g-factor ( $g = 2$ ),  $\mu_B$  is the Bohr magneton, and  $N_A$  is the Avogadro constant, respectively. The value of  $x$  is given by

$$x = \frac{g\mu_B S}{k_B} \left( \frac{H}{T - T_0} \right),$$

where  $k_B$  is a Boltzmann constant. When we use the exchange coupling ( $J=7.5$  K) as  $T_0$ ,  $\alpha = 0.3$  and  $\beta = 0.15$  are determined.

### Estimation of the transfer integrals $t$ from the exchange coupling $J$

The transfer integrals are roughly calculated from the following equation:

$$|J| = \frac{2t^2}{U},$$

where  $t$  is the transfer integral and  $U$  is a Coulomb interaction. The above equation

assumes a uniform triangular lattice.  $U$  is expected to be approximately 1 eV in the case of organic conductors. When  $J = 7.5$  K and  $U = 1$  eV are used, we can verify the small transfer integral  $t = 18$  meV, which is the same order as the value calculated using the ADF program.

## References

- [S1] M. J. Frisch, G. W. Trucks, H. B. Schlegel, G. E. Scuseria, M. A. Robb, J. R. Cheeseman, G. Scalmani, V. Barone, B. Mennucci, G. A. Petersson, H. Nakatsuji, M. Caricato, X. Li, H. P. Hratchian, A. F. Izmaylov, J. Bloino, G. Zheng, J. L. Sonnenberg, M. Hada, M. Ehara, K. Toyota, R. Fukuda, J. Hasegawa, M. Ishida, T. Nakajima, Y. Honda, O. Kitao, H. Nakai, T. Vreven, J. A. Montgomery, Jr., J. E. Peralta, F. Ogliaro, M. Bearpark, J. J. Heyd, E. Brothers, K. N. Kudin, V. N. Staroverov, R. Kobayashi, J. Normand, K. Raghavachari, A. Rendell, J. C. Burant, S. S. Iyengar, J. Tomasi, M. Cossi, N. Rega, J. M. Millam, M. Klene, J. E. Knox, J. B. Cross, V. Bakken, C. Adamo, J. Jaramillo, R. Gomperts, R. E. Stratmann, O. Yazyev, A. J. Austin, R. Cammi, C. Pomelli, J.W. Ochterski, R. L.Martin, K.Morokuma, V. G. Zakrzewski, G. A. Voth, P. Salvador, J. J. Dannenberg, S. Dapprich, A. D. Daniels, Ö. Farkas, J. B. Foresman, J. V. Ortiz, J. Cioslowski and D. J. Fox, Gaussian 09, Gaussian, Inc., Wallingford, CT, 2009.
- [S2] D. Becke, *J. Chem. Phys.*, 1993, **98**, 5648-5652.
- [S3] P. C. Hariharan and J. A. Pople, *Theor. Chim. Acta*, 1973, **28**, 213-222.
- [S4] W. E. Estes, D. P. Gavel, W. E. Hatfield and D. J. Hodgson, *Inorg. Chem.*, 1978, **17**, 6, 1415-1421.
- [S5] J. A. Gaj, R. Planel and G. Fishman, *Solid State Commun.*, 1979, **29**,435-438.
